# Supplementary material for: Reduced CD160 Expression Contributes to Impaired NK-cell Function and Poor Clinical Outcomes in Patients with HCC
Source: Oxford University Press journal article supplement (doi:10.1158/0008-5472.can-18-1049), 2018-09-19
Supplement: 00085472can181049-sup-199801_2_supp_5006744_plk4m0.pdf [file 00085472can181049-sup-199801_2_supp_5006744_plk4m0.pdf]

**S.Fig.5**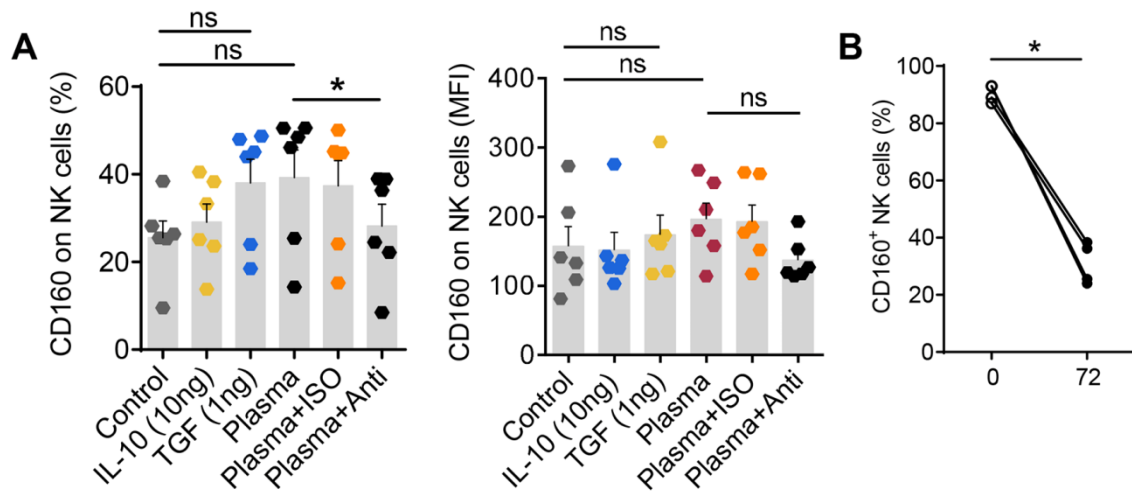

**Figure S5.** (A) Peripheral NK cells from healthy controls were cultured with medium alone, TGF- $\beta$ 1 (1 ng/ml), IL-10 (10 ng/ml), or HCC patient plasma treated with or without anti-TGF- $\beta$ 1 or isotype control for 3 days. Cumulative percentage (left) and MFI (right) of CD160<sup>+</sup> NK cells were analyzed via flow cytometry. (B) CD160 expression level on NK cells from each HC cultured with medium alone was monitored at 0h and 72h by flow cytometry. Results are expressed as the mean  $\pm$  SEM. \* $P$ <0.05; \*\* $P$ <0.01; \*\*\* $P$ <0.001; \*\*\*\* $P$ <0.0001.
